# Supplementary material
Source: PubMed Central journal article supplement (PMC2275782)

## Supplemental Data

### Distinct Roles of Chromatin-Associated

### Proteins MDC1 and 53BP1

### in Mammalian Double-Strand Break Repair

Anyong Xie, Andrea Hartlerode, Manuel Stucki, Shobu Odate, Nadine Puget, Amy Kwok, Ganesh Nagaraju, Catherine Yan, Frederick W. Alt, Junjie Chen, Stephen P. Jackson, and Ralph Scully

#### Supplemental Experimental Procedures:

##### siRNA oligos and shRNA constructs

Control RNAi duplex (AAU AACAGUGACCUUUAUGGAdTdT), RNAi duplex against mouse *BRCA1* (AACCAGAAGAAAGGGCCUUCAdTdT), human *53BP1* (GCCAGGUUCUAGAGGAUGAdTdT), and RNAi smart-pool against mouse *BRCA2* and *Rad51* were purchased from Dharmacon. pSUPER-MDC1 and LacZ shRNA constructs have been described (Stucki et al, 2005). Two pSUPER-mouse 53BP1 shRNA constructs were created by replacing MDC1-targeting sequence with mouse 53BP1-targeting sequences (#1: GTGGTCATCCAATGGCTAC or #2: GCCAGGTTCTGGAAGAAGA). The shRNA-expression cassettes were cloned into retroviral vector MSIHyg to generate MSIH-mouse 53BP1 shRNA constructs.

##### Cell lines

Doxycyclin (Dox)-inducible I-SceI expression system in U2OS reporter cells was established according to BD<sup>TM</sup> Tet-ON Gene Expression Systems User Manual (BD Biosciences) and will be described in detail in a later manuscript. Mouse reporter ES

cells stably expressing control and mouse 53BP1 shRNA were generated by transfecting cells with MSIH-shRNA constructs and selecting in hygromycin (400µg/mL).

### **Antibodies**

Commercial antibodies used include mouse monoclonal anti-CHK1 antibody (Santa Cruz Biotechnology) and rabbit polyclonal anti-53BP1 (Novus Biologicals) and anti-myc (Abcam). Mouse monoclonal anti-human 53BP1 antibody (BP13) and sheep polyclonal anti-human MDC1 antibody have been described previously (Rappold et al., 2001; Stucki et al., 2005).

### **Supplemental References:**

Stucki, M., Clapperton, J.A., Mohammad, D., Yaffe, M. B., Smerdon, S. J., and Jackson S. P. (2005). MDC1 directly binds phosphorylated histone H2AX to regulate cellular responses to DNA double-strand breaks. *Cell* 123, 1213-1226.

Rappold, I., Iwabuchi, K., Date, T., and Chen, J. (2001). Tumor suppressor p53 binding protein 1 (53BP1) is involved in DNA damage-signaling pathways. *J. Cell. Biol.* 153, 613-620.

### **Supplemental figure legends:**

**Figure S1. Influence of H2AX residue 142 on MDC1-BRCT suppression of HR.** **A.** H2AX Y142F or Y142W, but not Y142A, stably expressed in *H2AX*<sup>-/-</sup> ES cells restores efficient HR. Paired *t*-test between “Y142A” and “WT”: P < 0.2%; between “Y142A” and “Y142F”: P < 0.003%; between “Y142A” and “Y142W”: P < 0.08%; between “WT” and “Y142W”: P < 4.35%. **B.** Transient over-expression of MDC1 BRCT suppresses I-SceI-induced HR function of H2AX Y142F or Y142W mutant stably expressed in *H2AX*<sup>-/-</sup> ES cells. Paired *t*-test between “mMDC1 BRCT” and “mMDC1 BRCT K1554M”: P < 0.12% in WT, P < 0.88% in Y142F, P < 4.74% in Y142W, and not significant in Y142A.

**Figure S2. Depletion of MDC1 by shRNA reduces SCR in U2OS cells.** **A.** I-SceI-induced GFP<sup>+</sup> frequencies (left panel), BsdR<sup>+</sup> frequencies (middle panel), and ratio of BsdR<sup>+</sup> to GFP<sup>+</sup> frequency (right panel) in U2OS reporter cells, transiently transfected with lacZ- and MDC1-targeting shRNA constructs. Bars represent mean of a representative experiment with triplicates. Error bars indicate SEM. Paired *t*-test between “MDC1” and “control”: P < 0.22% in %GFP<sup>+</sup> cells (left panel), P < 1.47% in %BsdR<sup>+</sup> cells (middle panel), and not significant in %BsdR<sup>+</sup>/GFP<sup>+</sup> (right panel). **B.** Abundance of MDC1 protein in cells transfected with either lacZ- or MDC1-targeting shRNA plasmids.

**Figure S3. Transient expression of MDC1 rescues HR in *MDC1*<sup>-/-</sup> cells.** **A.** I-SceI induced GFP<sup>+</sup> frequencies in *MDC1*<sup>-/-</sup> MEF cells containing the SCR reporter, transiently transfected with myc-tagged mouse *MDC1* expression plasmid. Bars represent mean of a representative experiment with triplicates. Error bars indicate SEM. Paired *t*-test between “MDC1” and “Vector”: P < 0.36%. Steady state level of mouse MDC1 protein is shown

under the graph. **B.** I-SceI induced GFP<sup>+</sup> frequencies in *MDC1*<sup>-/-</sup> MEF reporter cells transiently transfected with myc-tagged mouse wt*MDC1* or mutant *MDC1* expression plasmids. Bars represent mean of a representative experiment with triplicates. Error bars indicate SEM. Paired *t*-test between “WT” and “Vector”: P < 1.14%; between “WT” and “K1554M”: P < 1.14%; between “WT” and “ΔFHA”: P < 1.18%; between “WT” and “ΔPST”: P < 1.77%; between “K1554M” and “Vector”: P < 4.21%; between “WT” and “ΔSQ”: not significant.

**Figure S4. BRCA1, Rad51, and BRCA2 HR functions do not require H2AX.** The percentage of I-SceI-induced GFP<sup>+</sup> cells from ES cell lines transfected with RNAi duplex. *H2AX*<sup>+/+</sup> and *H2AX*<sup>-/-</sup> ES cell lines as indicated were transiently transfected with control RNAi or RNAi against BRCA1, Rad51, or BRCA2, together with I-SceI expression plasmid. GFP<sup>+</sup> cells were quantified by flow cytometry analysis 3 days post-transfection. Bars represent mean of a representative experiment with triplicates. Error bars indicate SEM. Paired *t*-test between “siCtrl” and “siBRCA1”: P < 0.05% in *H2AX*<sup>+/+</sup> cells and P < 0.45% in *H2AX*<sup>-/-</sup> cells; between “siCtrl” and “siRad51”: P < 0.004% in *H2AX*<sup>+/+</sup> cells and P < 0.30% in *H2AX*<sup>-/-</sup> cells; between “siCtrl” and “siBRCA2”: P < 0.028% in *H2AX*<sup>+/+</sup> cells and P < 0.67% in *H2AX*<sup>-/-</sup> cells.

**Figure S5. Depletion of 53BP1 stimulates HR.** **A.** The percentage of I-SceI-induced GFP<sup>+</sup> cells from U2OS reporter cells containing Dox-inducible I-SceI expression system transfected with control RNAi duplex or RNAi against 53BP1. Dox (1μg/mL) was administrated to induce I-SceI expression 24 hours post-transfection. Mock treatment was

also indicated. GFP<sup>+</sup> cells were quantified by flow cytometry 72 hours post-transfection. Bars represent mean of a representative experiment with triplicates. Error bars indicate SEM. Paired *t*-test between “control siRNA” and “53BP1 siRNA” for Dox treatment:  $P < 0.14\%$ . Protein levels with siRNA treatment were shown under the chart. **B.** Dox-inducible I-SceI expression in U2OS reporter cells used in (A). Cells were administrated with Dox (1 $\mu$ g/mL), lysed at indicated time points, and analyzed for myc-I-SceI by Western blotting with anti-myc antibody. Non-specific protein bands detected by anti-myc were used as a loading control. **C.** The percentage of I-SceI-induced GFP<sup>+</sup> cells from mouse ES reporter cells stably expressing control or mouse 53BP1 shRNAs transfected with I-SceI expression plasmid. Bars represent mean of a representative experiment with triplicates. Error bars indicate SEM. Paired *t*-test between “ctrl shRNA” and “53BP1 shRNA #1”:  $P < 0.5\%$ ; between “ctrl shRNA” and “53BP1 shRNA #2”:  $P < 3.1\%$ . Protein levels of 53BP1 with shRNA treatment were shown under the chart with protein levels of CHK1 as a loading control.

**Figure S6. Effect of 53BP1 on NHEJ-dependent recircularization of a transfected linearized plasmid.**

(A). Plasmid pEGFP-N3 as an NHEJ substrate in a plasmid-based assay. pEGFP-N3 (Clontech) contains unique HindIII and KpnI sites between the CMV promoter and the EGFP open reading frame (ORF) and is linearized as the NHEJ substrate by HindIII or HindIII/KpnI. Expression of GFP is abolished in these linear plasmids and restored by NHEJ-dependent re-circularization of linear DNA. pEGFP-N3 linearized by StuI serves as a control for transfection efficiency. HindIII, KpnI, and StuI sites are indicated. (B).

Percentage of GFP+ cells from mouse *53BP1*<sup>+/+</sup> and *53BP1*<sup>-/-</sup> embryonic cells, transiently transfected with either one of NHEJ substrates (as indicated), corrected for transfection efficiency. Bars represent mean of triplicate samples; error bars indicate SEM. Paired *t*-test between *53BP1*<sup>+/+</sup> and *53BP1*<sup>-/-</sup> embryonic cells: not significant for both NHEJ substrates ( $P > 0.1$  and  $P > 0.07$  respectively). (C). Percentage of GFP+ cells from mouse *XRCC4*<sup>+/+</sup> and *XRCC4*<sup>-/-</sup> embryonic stem cells, transiently transfected with linear pEGFP-N3-HindIII plasmid and expression plasmids for empty vector, HA-tagged F-53BP1 or F-D1521R as indicated. All data was corrected for transfection efficiency. Bars represent mean of triplicate samples; error bars indicate SEM. Paired *t*-test between “empty vector” and “F-53BP1” and between “F-53BP1” and “F-D1521R”: not significant (all  $P > 6\%$ ). (D). Similar experiment to (C), but with transiently transfected linear pEGFP-N3-HindIII/KpnI plasmid as substrate. Paired *t*-test between “empty vector” and “F-53BP1” and between “F-53BP1” and “F-D1521R”: not significant (all  $P > 0.2$ ).

Figure S1

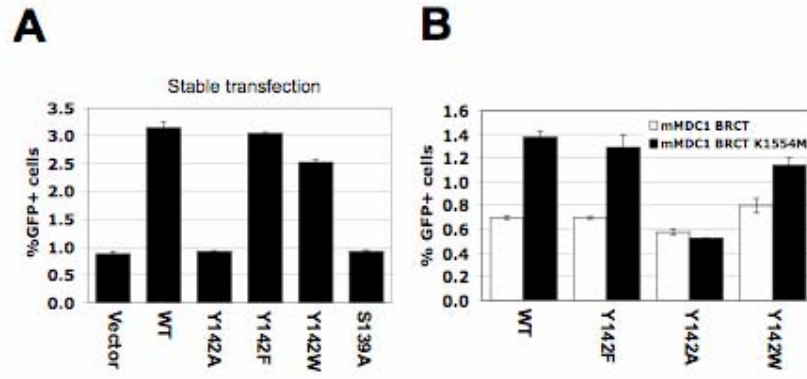

Figure S2

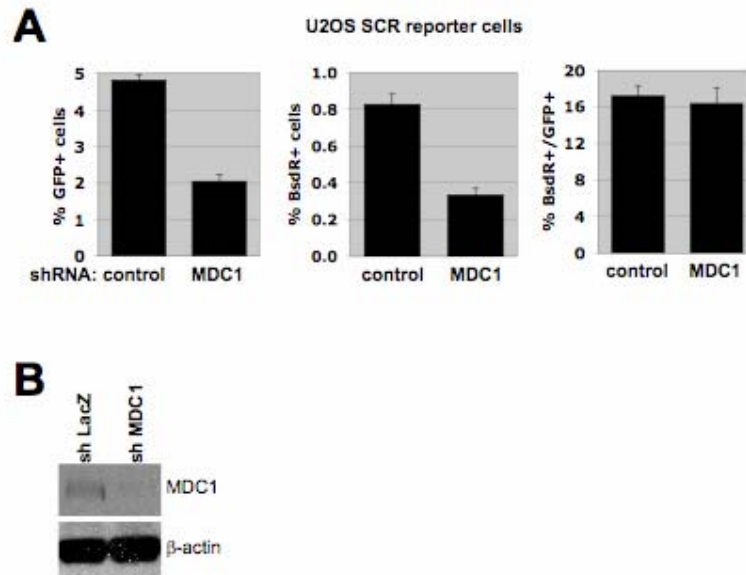



Figure S3

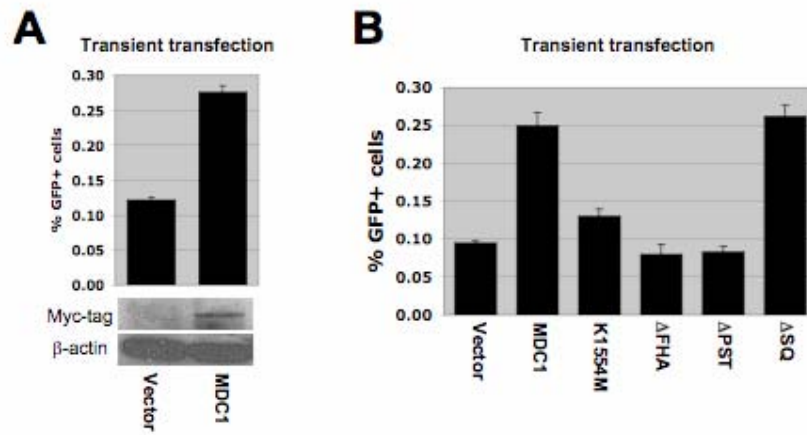

Figure S4

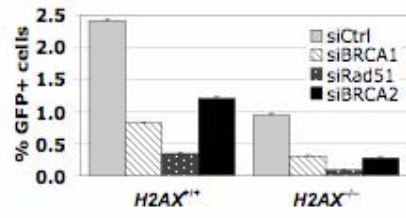

Figure S5

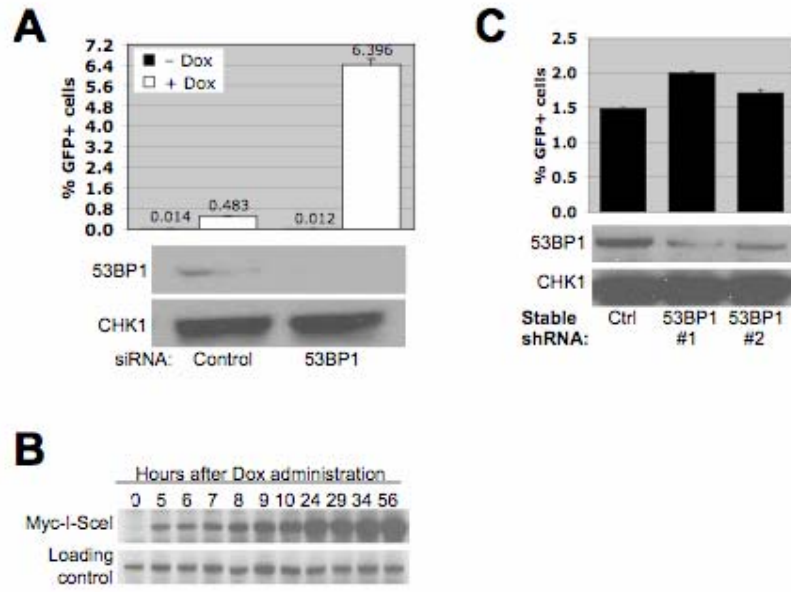

Figure S6

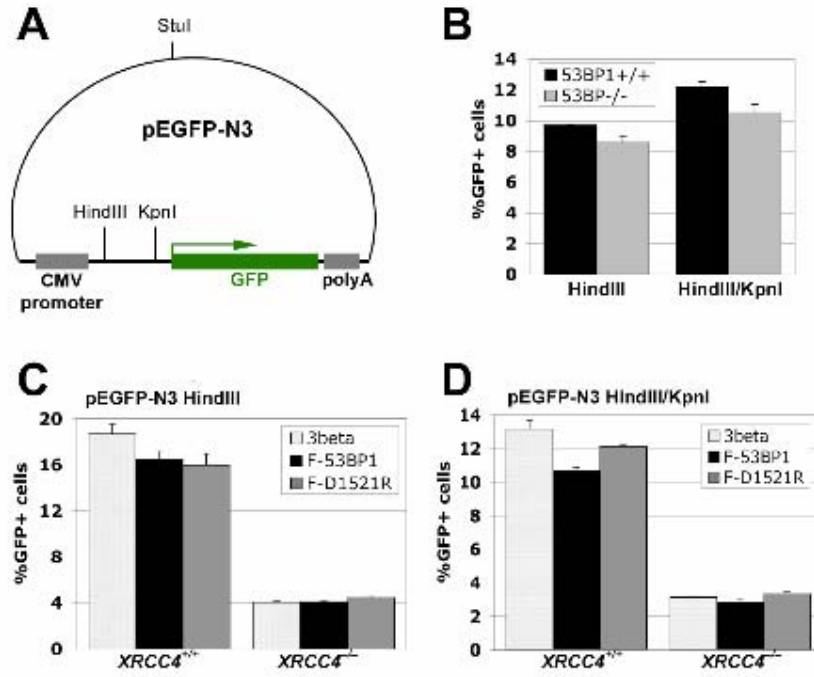

Supplement: NIHMS39417-supplement-01.pdf [file NIHMS39417-supplement-01.pdf]
